# Supplementary material
Source: Springer Nature journal article supplement (https://www.springermedizin.de/resource/supplementary/13030_2010_87_MOESM3_ESM.pdf/9644738)
Supplement: MOESM3 [file 9644738]

Accident-related injured patients admitted to the ICU

Psychological first-aid provided by clinical psychologist

Written informed consent

Random allocation (n=140)

Allocated to omega-3 fatty acid supplementation (n=70)

Allocated to placebo supplementation (n=70)

Follow-up interview at 4 weeks

Follow-up interview at 12 weeks
